# Supplementary material for: Frail phenotype might herald bone health worsening among end-stage renal disease patients
Source: PeerJ. 2017 Jul 10;5:e3542. doi: 10.7717/peerj.3542 (PMC5507170; doi:10.7717/peerj.3542)
Supplement: File S1 [file peerj-05-3542-s001.xls]

## Sheet: Sheet1
Patient	L1_Area_2016	L1_TBS_2016	L1_BMD_2016	L1_Tscore_2016	L1_Zscore_2016	L2_Area_2016	L2_TBS_2016	L2_BMD_2016	L2_Tscore_2016	L2_Zscore_2016	L3_Area_2016	L3_TBS_2016	L3_BMD_2016	L3_Tscore_2016	L3_Zscore_2016	L4_Area_2016	L4_TBS_2016	L4_BMD_2016	L4_Tscore_2016	L4_Zscore_2016	average_Area_2016	average_TBS_2016	average_BMD_2016	average_Tscore_2016	average_Zscore_2016	Neck_Area_2016	Neck_BMC_2016	Neck_BMD_2016	Neck_Tscore_2016	Neck_Zscore_2016	Total_Area_2016	Total_BMC_2016	Total_Tscore_2016	Total_Zscore_2016
1	14.48	1.382	0.849	-1	0.8	12.97	1.242	0.83	-1.3	0.8						16.22	1.489	0.773	-2.2	0.3	43.66	1.371	0.815	-1.5	0.7	4.79	2.28	0.475	-3.1	-1.1	30.59	18.23	-2.2	-0.8
2	15.79	1.343	0.945	-0.3	0.1	15.18	1.473	0.86	-1.1	-0.5	17.08	1.488	0.915	-1.1	-0.4	18.33	1.442	0.941	-0.8	-0.2	66.38	1.437	0.917	-0.9	-0.3	5.43	3.94	0.725	-1	-0.2	45.85	39.33	-0.6	-0.2
3	15.63	1.511	0.917	-0.4	1.6	15.58	1.429	0.889	-0.8	1.5	18.06	1.494	1.104	0.6	2.6						49.26	1.478	0.976	0	2.1	4.48	3.19	0.713	-0.8	2.3	30.71	24.22	-0.5	1.5
4	11.94	1.317	0.701	-2.3	0						20.85	1.365	0.739	-2.5	0.1	17.57	1.265	0.631	-3.4	-0.4	50.36	1.316	0.692	-2.7	0	4.87	1.76	0.362	-4.1	-2.1	28.98	12.22	-3.7	-2
5	13.16	1.385	0.742	-2	0.5	15.07	1.514	1.029	0.4	2.4	12.32	1.304	0.701	-2.9	0.1	14.02	1.165	0.651	-3.2	-0.1	54.57	1.342	0.789	-1.9	0.7	5.17	2.31	0.448	-3.3	-0.4	26.03	12.67	-3.2
6	15.47	1.603	1.051	0.5	0.8	15.06	1.537	1.184	1.6	1.6	16.06	1.5	1.046	0	0.5	15.82	1.459	0.966	-0.6	0.1	62.41	1.525	1.06	0.3	0.7	5.02	3.16	0.629	-1.7	-0.7	35.82	30.77	-0.6	-0.1
7	16.95	1.463	1.073	0.7	1	17.81	1.559	1.12	1	1.2	18.55	1.53	1.06	0.1	0.5						53.32	1.518	1.084	0.8	1	5.84	4.34	0.744	-0.8	0.1	42.41	43.92	0.7	1.1
8	10.99	1.277	0.69	-2.4	0	11.51	1.345	0.718	-2.3	0.3	12.25	1.352	0.709	-2.8	0	15.08	1.278	0.794	-2	0.7	49.84	1.313	0.733	-2.4	0.3	5.04	2.66	0.528	-2.6	0	30.07	19.93	-1.6	0.2
9	15.46	1.324	0.722	-2.2	-0.7	16.46	1.409	0.816	-1.5	-0.2	17.21	1.429	0.756	-2.5	-0.8	19.11	1.457	0.71	-2.8	-1	68.23	1.405	0.75	-2.3	-0.7	5.45	3.01	0.553	-2.4	-1	40.17	27.17	-1.9	-1
10	14.01	1.413	0.972	-0.1	0.3	15.39	1.508	0.928	-0.6	0	15.49	1.393	0.986	-0.5	0.1	17.69	1.38	0.906	-1.1	-0.4	62.58	1.423	0.946	-0.7	0	5.83	4.09	0.701	-1.2	-0.3	35.95	31.18	-0.5	-0.1
11		1.439	0.975	-0.1	0.4	17.88	1.449	1.006	0.1	0.6	18.31	1.449	1.021	-0.2	0.4	21.28	1.439	0.877	-1.4	-0.3	75.19	1.444	0.966	-0.5	0.2	5.25	3.42	0.651	-1.6	-0.4	35.82	29.3	-0.9	-0.2
12	13.91	1.386	0.843	-1.2	-0.1	12.43	1.544	0.796	-1.7	-0.4	14	1.396	0.857	-1.6	-0.3	20.33	1.395	0.885	-1.3	-0.1	60.67	1.43	0.851	-1.4	-0.2	5.14	3.01	0.586	-2.1	-0.7	35.42	25.92	-1.5	-0.7
13	11	1.274	0.744	-2	-0.3	11.26	1.328	0.784	-1.7	0.1	12.28	1.439	0.843	-1.6	0.2	12.96	1.218	0.787	-2.1	-0.1	47.49	1.315	0.791	-1.9	-0.1	4.45	2.61	0.587	-2	-0.5	27.07	19.43	-1.2	-0.3
14	14.09	1.47	0.939	-0.3	1.6	14.47	1.535	0.999	0.2	2	13.8	1.394	1.093	0.5	2.4	15.22	1.441	1.071	0.4	2.4	57.57	1.46	1.026	0.2	2.1	4.61	2.61	0.566	-2.2	0.3	26.66	19.63	-1	0.8
15	13.35	1.316	0.875	-0.9	-0.1	14.34	1.464	0.871	-1	-0.2	16.26	1.428	0.926	-1	-0.2	16.98	1.351	0.983	-0.5	0.2	60.93	1.39	0.918	-0.9	-0.1	4.56	2.48	0.544	-2.4	-1.3	48.45	39.64	-0.9	-0.3
16	13.64	1.277	0.767	-1.7	0.1	13.9	1.368	0.762	-1.9	0.1	14.43	1.405	0.806	-2	0.2	17.14	1.553	0.801	-1.9	0.3	59.11	1.401	0.785	-1.9	0.2	4.61	2.13	0.462	-3.2	-1.6	31.74	16.95	-2.8	-1.6
17	13.68	1.535	0.961	-0.1	1.5	13.7	1.559	1.062	0.7	2.2	15.08	1.503	1.178	1.3	2.7	16.09	1.491	1.162	1.2	2.8	58.55	1.522	1.096	0.8	2.3	4.57	3.23	0.705	-0.9	1.1	30.67	25	-0.3	0.8
18						13.17	1.442	0.821	-1.4	1	13.54	1.456	0.781	-2.2	0.6	15.5	1.351	0.813	-1.8	0.9	42.21	1.416	0.805	-1.9	0.7	4.26	1.78	0.416	-3.6	-0.9	27.67	17.01	-2.1	0.1
19	12.6	1.425	0.997	0.3	1.9	12.2	1.408	0.892	-0.8	1.2	11.57	1.425	0.979	-0.4	1.6	17.9	1.479	0.978	-0.4	1.7	54.28	1.434	0.963	-0.4	1.6	4.23	2.56	0.605	-1.9	0.5	30.71	22.32	-1.1	0.5
20						15.49	1.488	0.931	-0.4	1.8	15.24	1.517	1.047	0.1	2.3						30.73	1.502	0.989	-0.1	2	4.63	2.06	0.444	-3.4	-0.3	33.07	20.48	-2
21	19.91	1.447	1.038	0.4	0.7	15.22	1.481	1.012	0.1	0.5	18.7	1.503	0.997	-0.4	0.1	19.11	1.485	0.999	-0.4	0.2	72.94	1.479	1.012	-0.1	0.4	5.75	5.39	0.937	0.7	1.6	46.82	45.94	0.3	0.7
22											16.55	1.491	0.898	-1.2	1.2	16.14	1.437	0.769	-2.2	0.6	32.69	1.464	0.834	-1.9	0.7	4.6	1.83	0.398	-3.8	-1.4	35.15	14.67	-3.8	-1.8
23	15.16	1.453	0.88	-0.9	0	14.41	1.528	1.03	0.3	0.7	15.93	1.486	1.004	-0.4	3	20.05	1.634	1.137	0.8	1.1	65.56	1.525	1.022	0	0.6	5.2	3.51	0.675	-1.4	-0.1	37.57	28.84	-1.3	-0.5
24	13.77	1.414	0.908	-0.6	0	15.25	1.525	0.936	-0.5	0.1	15.87	1.423	0.958	-0.8	0	18.61	1.471	0.927	-1	-0.1	63.5	1.458	0.933	-0.8	0	5.56	3.55	0.638	-1.7	-0.6	37.13	29.56	-1.1	-0.5
25	14.28	1.48	1.204	1.8	1.7	15.78	1.591	1.197	1.7	1.6	18.91	1.573	1.283	1.9	1.8	19.63	1.594	1.295	2.1	1.9	68.6	1.559	1.251	1.9	1.8	5.12	4.93	0.962	0.9	2.1	37.04	43.18	1.6	2.3
26	12.7	1.233	0.78	-1.6	0.3	12.97	1.351	0.831	-1.3	0.7	15.47	1.315	0.831	-1.7	0.4	16.43	1.268	0.807	-1.9	0.4	57.56	1.292	0.813	-1.7	0.4	4.66	2.79	0.599	-1.9	0	31.7	25.55	-0.4	0.8
27	16.12	1.714	1.135	1.3	1.3	16.7	1.686	1.183	1.6	1.5	18.29	1.567	1.309	2.2	1.9	21.86	1.564	1.263	1.8	1.8	72.97	1.633	1.228	1.7	1.6	5.8	4.64	0.8	-0.4	0.7	50.21	39.57	-1.1	-0.5
28	14.07	1.289	0.705	-2.3	-0.4	12.25	1.302	0.602	-3.3	-1	14.59	1.312	0.612	-3.6	-1.2	15.32	1.307	0.617	-3.5	-1.1	56.23	1.302	0.634	-3.2	-0.9	4.96	2.95	0.595	-1.9	-0.2	35.13	21.93	-2	-1
29	16.61	1.47	0.716	-2.2	0.3	14.17	1.338	0.683	-2.6	0.1	11.49	1.221	0.707	-2.8	0.1	18.1	1.438	0.7	-2.8	0.2	60.37	1.367	0.702	-2.6	0.1	4.75	2.56	0.538	-2.5	0.3	28.84	16.17	-2.5	-0.5
30	15.53	1.524	1.227	2	1.8	16.89	1.556	1.211	1.8	1.7	16.86	1.549	1.31	2.2	2	17.99	1.518	1.27	1.9	1.9	67.27	1.537	1.255	1.9	1.8	5.6	4.08	0.729	-0.9	0.3	39.01	36.94	0	0.8
31	16.79	1.467	1.047	0.5	1	14.58	1.479	1.031	0.3	0.9	15.52	1.442	1.177	1.1	1.4	17.04	1.521	1.192	1.3	1.5	63.93	1.477	1.114	0.7	1.2	5.05	3.38	0.669	-1.4	0	33.82	25.53	-1.4	-0.5
32	15.33	1.419	0.908	-0.6	0.4	15.96	1.496	0.963	-0.3	0.7	19.51	1.512	1.023	-0.2	0.8						50.8	1.476	0.97	-0.2	0.8	5.23	3.38	0.648	-1.6	0	39.89	39.39	0.3	1.5
33	13.3	1.568	0.852	-1	0.9	12.9	1.421	0.925	-0.5	1.5						18.77	1.432	1.13	0.9	2.7	44.97	1.474	0.989	0	1.9	4.69	2.69	0.574	-2.1	0.2	30.48	20.54	-1.5	0.1
34	16.13	1.531	1.093	0.9	1.1	18.26	1.511	1.067	0.6	0.9	17.69	1.481	1.188	1.2	1.3						52.09	1.508	1.116	1.1	1.2	5.95	4.39	0.738	-0.9	0.2	40.61	37.95	0	0.6
35	11.71	1.372	0.764	-1.8	0.3	15.33	1.349	0.551	-3.7	-0.1	20.85	1.283	0.688	-3	-0.4	26.82	1.354	0.722	-2.6	0	74.7	1.34	0.684	-2.8	-0.3	5.12	2.76	0.539	-2.5	-0.3	35.63	20.54	-2.4	-0.9
36	14.42	1.238	0.965	0	1.6	15.01	1.345	0.969	-0.1	1.7	16.27	1.381	1.047	0.1	2	17.14	1.463	0.971	-0.5	1.6	62.84	1.357	0.989	-0.1	1.7
